# Supplementary material for: In silico screening of LRRK2 WDR domain inhibitors using deep docking and free energy simulations
Source: Royal Society of Chemistry journal article supplement (doi:10.1039/d3sc06880c), 2024-01-01
Supplement: d3sc06880c1.pdf [file d3sc06880c1.pdf]

*Supplementary Information for*

***In silico* screening of LRRK2 WDR domain inhibitors using deep docking and free energy simulations**

Evgeny Gutkin<sup>1,†</sup>, Filipp Gusev<sup>1,2,†</sup>, Francesco Gentile<sup>3,4,†</sup>, Fuqiang Ban<sup>3</sup>, S. Benjamin Koby<sup>1</sup>, Chamali Narangoda<sup>1</sup>, Olexandr Isayev<sup>1,2,\*</sup>, Artem Cherkasov<sup>3,\*</sup>, Maria G. Kurnikova<sup>1,\*</sup>

1. *Department of Chemistry, Mellon College of Science, Carnegie Mellon University, Pittsburgh, PA, 15213*

2. *Computational Biology Department, School of Computer Science, Carnegie Mellon University, Pittsburgh, PA, 15213*

3. *Vancouver Prostate Centre, The University of British Columbia, Vancouver, BC, Canada*

4. *Department of Chemistry and Biomolecular Sciences, University of Ottawa, Ottawa, ON, BC, Canada*

† These authors contributed equally and share co-first authorship

\* Corresponding authors

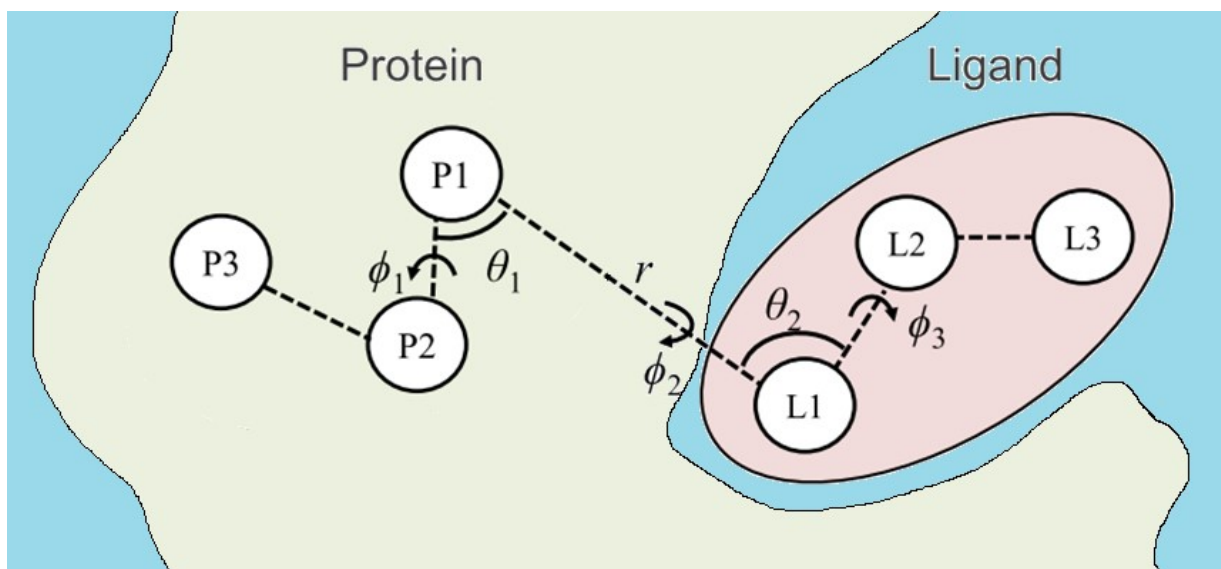

Figure S1. Schematic representation of the virtual bond (1) used for restraining the orientation of ligand in protein. P1, P2, P3 are L1, L2, L3 are atoms of protein and ligand used for specifying six degrees of freedom: distance  $r$ , angles  $\theta_1$  and  $\theta_2$ , and torsion angles  $\phi_1$ ,  $\phi_2$ , and  $\phi_3$ .

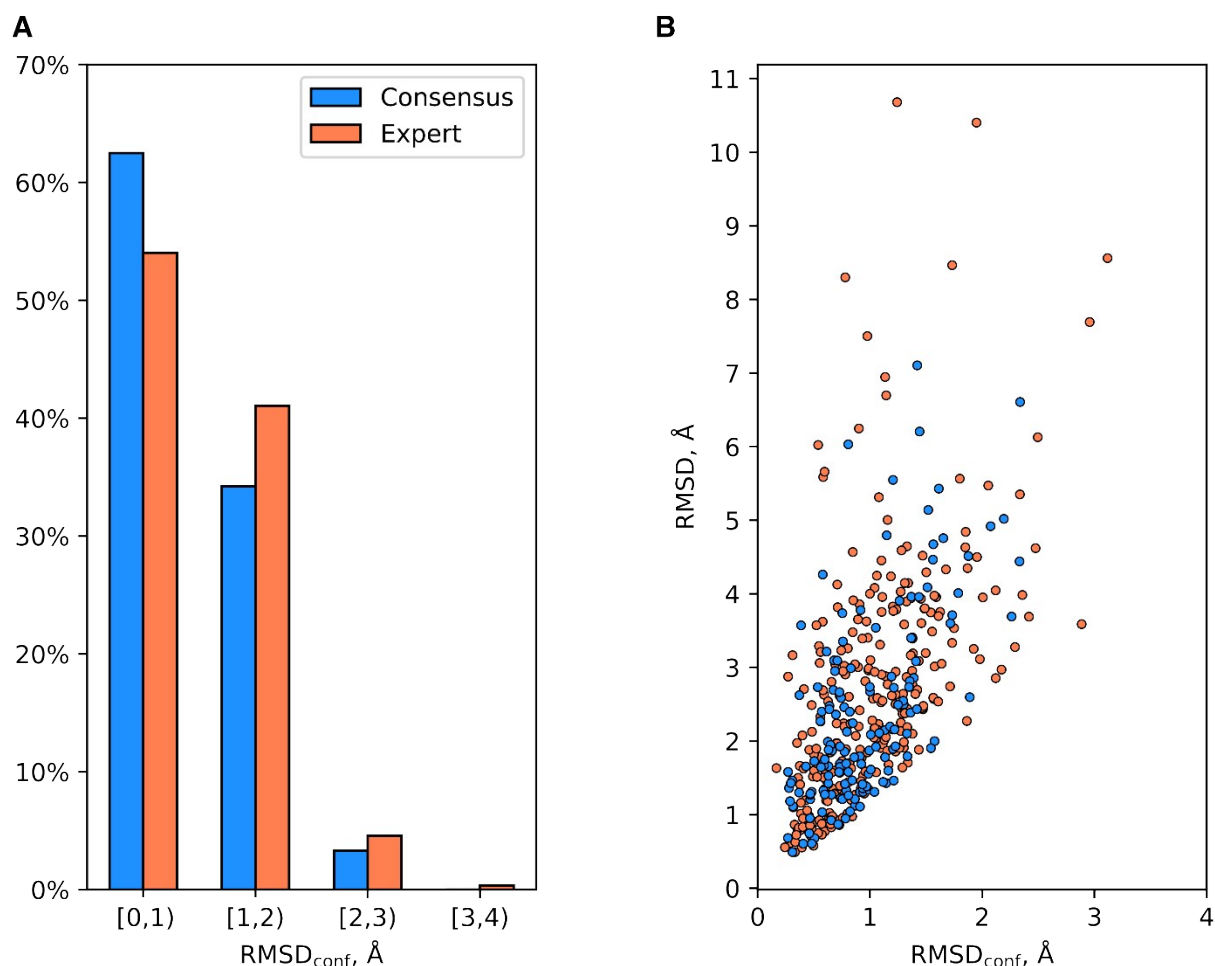

Figure S2. A. The distribution of conformational ligand RMSD of MD representative pose with respect to docked pose. B. Scatter plot of total ligand RMSD versus conformational RMSD of MD representative pose with respect to docked pose.

Conformational ligand RMSD is the RMSD of MD representative structure of ligand aligned to the initial (docked) pose of ligand. Only heavy atoms of ligand are used for both ligand alignment and RMSD calculation.

Total ligand RMSD is obtained by first aligning the MD representative structure of protein-ligand complex to its initial structure on  $C_{\alpha}$  atoms of protein residues forming the binding site of WDR domain, and then calculating the RMSD of MD representative structure of ligand with respect to the initial pose of ligand without additional ligand alignment.

## References

1. Borech S, Tettinger F, Leitgeb M, Karplus M. Absolute binding free energies: A quantitative approach for their calculation. *Journal of Physical Chemistry B*. 2003;107(35):9535-51.
